# Supplementary material for: Sodium–rare earth carbonates with shorite structure and large second harmonic generation response
Source: Royal Society of Chemistry journal article supplement (doi:10.1039/c4ce00183d), 2014-01-01
Supplement: c4ce00183d1.pdf [file c4ce00183d1.pdf]

## Supporting Information

Min Luo, Chensheng Lin, Guohong Zou, Ning Ye\* and Wendan Cheng  
*Key Laboratory of Optoelectronic Materials Chemistry and Physics,  
Fujian Institute of Research on the Structure of Matter,  
Chinese Academy of Sciences, Fuzhou, Fujian, 350002, P. R. China*  
Email: [nye@fjirsm.ac.cn](mailto:nye@fjirsm.ac.cn)

Table S1. Atomic coordinates and equivalent isotropic displacement parameters for Na<sub>3</sub>Y (CO<sub>3</sub>)<sub>3</sub>

| atom | x           | Y           | z            | U <sub>eq</sub> (Å <sup>2</sup> ) | BVS  |
|------|-------------|-------------|--------------|-----------------------------------|------|
| Y1   | -0.2500     | 0.72829 (6) | 0.50003 (17) | 0.010 (1)                         | 2.81 |
| O1   | -0.2500     | 0.9120 (5)  | 0.6801 (8)   | 0.015 (1)                         | 2.11 |
| O2   | -0.2500     | 0.6173 (5)  | 0.1931 (8)   | 0.015 (1)                         | 2.06 |
| O3   | -0.4881 (3) | 0.6923 (4)  | 0.4161 (5)   | 0.017 (1)                         | 2.33 |
| O4   | -0.2500     | 0.5111 (4)  | 0.4587 (7)   | 0.013 (1)                         | 2.10 |
| O5   | -0.3865 (4) | 0.6674 (4)  | 0.7653 (5)   | 0.013 (1)                         | 2.27 |
| O6   | -0.3899 (4) | 0.8574 (3)  | 0.3034 (5)   | 0.014 (1)                         | 2.19 |
| C1   | -0.2500     | 0.5119 (7)  | 0.2733 (11)  | 0.010 (2)                         | 3.96 |
| C2   | -0.4986 (5) | 0.7931 (5)  | 0.3254 (8)   | 0.011 (1)                         | 4.04 |
| Na1  | -0.2500     | 0.0185 (3)  | 0.3863 (5)   | 0.015 (1)                         | 0.95 |
| Na2  | -0.2500     | -0.2051 (2) | 0.0008 (9)   | 0.008 (1)                         | 0.90 |
| Na3  | -0.5000     | 0.0000      | 0.0682 (5)   | 0.016 (1)                         | 1.03 |

Table S2. Atomic coordinates and equivalent isotropic displacement parameters for Na<sub>3</sub>Gd (CO<sub>3</sub>)<sub>3</sub>

| atom | x          | y            | z            | U <sub>eq</sub> (Å <sup>2</sup> ) | BVS  |
|------|------------|--------------|--------------|-----------------------------------|------|
| Gd1  | 1.2500     | 0.77179 (2)  | 0.01265 (10) | 0.006 (1)                         | 3.17 |
| O1   | 1.2500     | 0.8846 (4)   | 0.3199 (7)   | 0.013 (1)                         | 2.09 |
| O2   | 1.3869 (3) | 0.8345 (3)   | -0.2545 (5)  | 0.009 (1)                         | 2.26 |
| O3   | 1.3909 (3) | 0.6416 (3)   | 0.2128 (4)   | 0.011 (1)                         | 2.15 |
| O4   | 1.2500     | 1.0875 (5)   | 0.3334 (8)   | 0.015 (1)                         | 2.02 |
| O5   | 1.4894 (3) | 0.8045 (4)   | 0.0959 (6)   | 0.015 (1)                         | 2.29 |
| O6   | 1.2500     | 0.9907 (4)   | 0.0565 (6)   | 0.010 (1)                         | 2.03 |
| C1   | 1.2500     | 0.9877 (6)   | 0.2412 (10)  | 0.007 (1)                         | 3.98 |
| C2   | 1.5005 (4) | 0.7957 (4)   | -0.3123 (8)  | 0.007 (1)                         | 3.94 |
| Na1  | 1.2500     | 0.9819 (2)   | 0.6260 (4)   | 0.011 (1)                         | 1.01 |
| Na2  | 1.5000     | 1.0000       | 0.9448 (4)   | 0.013 (1)                         | 1.16 |
| Na3  | 1.2500     | 0.70621 (16) | 0.5105 (10)  | 0.003 (1)                         | 0.86 |

Table S3. Bond lengths (Å) for Na<sub>3</sub>Y (CO<sub>3</sub>)<sub>3</sub>.

---

|              |            |                |            |
|--------------|------------|----------------|------------|
| Y(1)-O(1)    | 2.367(6)   | C(2)-O(5)#5    | 1.279(6)   |
| Y(1)-O(4)    | 2.381(6)   | C(2)-Na(3)#3   | 2.889 (9)  |
| Y(1)-O(5)#1  | 2.392(4)   | C(2)-Na(2)#4   | 2.922 (8)  |
| Y(1)-O(5)    | 2.392(4)   | Na(1)-O(5)#11  | 2.269 (7)  |
| Y(1)-O(6)    | 2.404(4)   | Na(1)-O(5)#9   | 2.269 (7)  |
| Y(1)-O(6)#1  | 2.404(4)   | Na(1)-O(6)#12  | 2.302 (7)  |
| Y(1)-O(3)    | 2.443(5)   | Na(1)-O(6)#13  | 2.302 (7)  |
| Y(1)-O(3)#1  | 2.443(5)   | Na(1)-O(1)#12  | 2.370 (9)  |
| Y(1)-O(2)    | 2.475(6)   | Na(1)-O(2)#13  | 2.412 (9)  |
| Y(1)-C(2)    | 2.823(6)   | Na(1)-C(1)#14  | 2.725 (12) |
| Y(1)-C(2)#1  | 2.823(6)   | Na(1)-Na(2)#2  | 3.115 (7)  |
| Y(1)-C(1)    | 2.845(8)   | Na(1)-Y(1) #12 | 3.258 (6)  |
| O(1)-C(1)#2  | 1.270(10)  | Na(1)-Na(3)    | 3.329 (6)  |
| O(1)-Na(1)#3 | 2.370 (9)  | Na(1)-Na(3)#2  | 3.329 (6)  |
| O(1)-Na(2)#4 | 2.592 (11) | Na(2)-O(2)#12  | 2.360 (10) |
| O(2)-C(1)    | 1.278(10)  | Na(2)-O(4)#9   | 2.371 (8)  |
| O(2)-Na(2)#3 | 2.360 (10) | Na(2)-O(5)#15  | 2.544 (8)  |
| O(2)-Na(1)#5 | 2.412 (9)  | Na(2)-O(5)#14  | 2.544 (8)  |
| O(3)-C(2)    | 1.274(7)   | Na(2)-O(1)#15  | 2.592 (11) |
| O(3)-Na(3)#2 | 2.354 (6)  | Na(2)-O(6)#13  | 2.624 (10) |
| O(3)-Na(2)#6 | 2.644 (6)  | Na(2)-O(6)#12  | 2.624 (10) |
| O(4)-C(1)    | 1.304(9)   | Na(2)-O(3)#17  | 2.644 (6)  |
| O(4)-Na(2)#2 | 2.371 (8)  | Na(2)-O(3)#18  | 2.644 (6)  |
| O(4)-Na(3)#7 | 2.576 (4)  | Na(2)-C(1)#9   | 2.853 (13) |
| O(4)-Na(3)#2 | 2.576 (4)  | Na(2)-C(2)#18  | 2.922 (8)  |
| O(5)-C(2)#3  | 1.279(6)   | Na(2)-C(2)#17  | 2.922 (8)  |
| O(5)-Na(1)#2 | 2.269 (7)  | Na(3)-O(3)#17  | 2.353 (6)  |
| O(5)-Na(2)#4 | 2.544 (8)  | Na(3)-O(3)#9   | 2.353 (6)  |
| O(5)-Na(3)#2 | 2.546 (6)  | Na(3)-O(6)#19  | 2.513 (6)  |
| O(6)-C(2)    | 1.286(6)   | Na(3)-O(6)#12  | 2.513 (6)  |

---

|              |            |               |           |
|--------------|------------|---------------|-----------|
| O(6)-Na(1)#3 | 2.302 (7)  | Na(3)-O(5)#9  | 2.546 (6) |
| O(6)-Na(3)#3 | 2.513 (6)  | Na(3)-O(5)#17 | 2.546 (6) |
| O(6)-Na(2)#3 | 2.624 (10) | Na(3)-O(4)#17 | 2.576 (4) |
| C(1)-O(1)#4  | 1.270(10)  | Na(3)-O(4)#9  | 2.576 (4) |
| C(1)-Na(1)#5 | 2.725 (12) | Na(3)-C(2)#19 | 2.889 (9) |
| C(1)-Na(2)#2 | 2.853 (13) | Na(3)-C(2)#12 | 2.889 (9) |

Symmetry transformations used to generate equivalent atoms:

#1  $-x-1/2, y, z$     #2  $x, y+1/2, z+1/2$     #3  $-x-1, -y+3/2, z+1/2$   
 #4  $x, y-1/2, z-1/2$     #5  $-x-1, -y+3/2, z-1/2$

Table S4. Bond lengths (Å) for Na<sub>3</sub>Gd (CO<sub>3</sub>)<sub>3</sub>.

|              |           |                |            |
|--------------|-----------|----------------|------------|
| Gd(1)-O(4)#1 | 2.394(5)  | C(1)-Na(1)     | 2.740 (11) |
| Gd(1)-O(6)   | 2.426(4)  | C(1)-Na(3)7#   | 2.910 (11) |
| Gd(1)-O(2)#2 | 2.437(3)  | C(2)-O(5)#8    | 1.285(7)   |
| Gd(1)-O(2)   | 2.437(3)  | C(2)-O(3)#8    | 1.292(6)   |
| Gd(1)-O(3)#2 | 2.456(3)  | C(2)-Gd(1)#8   | 2.870(5)   |
| Gd(1)-O(3)   | 2.456(3)  | C(2)-Na(2)5#   | 2.897 (8)  |
| Gd(1)-O(5)   | 2.475(3)  | C(2)-Na(3)5#   | 2.957 (8)  |
| Gd(1)-O(5)#2 | 2.475(3)  | Na(1)-O(2)10#  | 2.279 (5)  |
| Gd(1)-O(1)   | 2.515(5)  | Na(1)-O(2)11#  | 2.279 (5)  |
| Gd(1)-C(2)#4 | 2.870(5)  | Na(1)-O(3)6#   | 2.328 (5)  |
| Gd(1)-C(2)#3 | 2.870(5)  | Na(1)-O(3)7#   | 2.328 (5)  |
| Gd(1)-C(1)   | 2.878(7)  | Na(1)-Na(3)    | 3.140 (5)  |
| O(1)-C(1)    | 1.265(8)  | Na(1)-Gd(1)6#  | 3.287 (4)  |
| O(1)-Na(3)   | 2.385 (9) | Na(1)-Na(2)2#  | 3.369 (4)  |
| O(1)-Na(1)   | 2.428 (8) | Na(1)-Na(2)    | 3.369 (4)  |
| O(2)-C(2)    | 1.274(6)  | Na(1)-Gd(1)11# | 3.593 (4)  |
| O(2)-Na(1)5# | 2.279 (5) | Na(2)-O(5)13#  | 2.406 (6)  |

---

|              |            |               |            |
|--------------|------------|---------------|------------|
| O(2)-Na(2)5# | 2.566 (5)  | Na(2)-O(5)11# | 2.406 (6)  |
| O(2)-Na(3)5# | 2.576 (8)  | Na(2)-O(3)3#  | 2.515 (5)  |
| O(3)-C(2)#3  | 1.291(6)   | Na(2)-O(3)6#  | 2.515 (5)  |
| O(3)-Na(1)1# | 2.328 (5)  | Na(2)-O(2)11# | 2.566 (5)  |
| O(3)-Na(1)2# | 2.515 (5)  | Na(2)-O(2)13# | 2.566 (5)  |
| O(3)-Na(3)   | 2.637 (10) | Na(2)-O(6)13# | 2.608 (2)  |
| O(4)-C(1)    | 1.278(9)   | Na(2)-O(6)11# | 2.608 (2)  |
| O(4)-Na(1)   | 2.385 (8)  | Na(2)-C(2)11# | 2.897 (8)  |
| O(4)-Gd(1)#4 | 2.394 (7)  | Na(2)-C(2)13# | 2.897 (8)  |
| O(4)-Na(3)7# | 2.643 (11) | Na(3)-O(6)15# | 2.391 (6)  |
| O(5)-C(2)#3  | 1.284(7)   | Na(3)-O(2)11# | 2.576 (8)  |
| O(5)-Na(2)5# | 2.406 (6)  | Na(3)-O(2)10# | 2.576 (8)  |
| O(5)-Na(3)8# | 2.660 (5)  | Na(3)-O(3)2#  | 2.637 (10) |
| O(6)-C(1)    | 1.315(8)   | Na(3)-O(4)15# | 2.643 (11) |
| O(6)-Na(3)7# | 2.391 (6)  | Na(3)-O(5)3#  | 2.660 (5)  |
| O(6)-Na(2)4# | 2.608 (2)  | Na(3)-O(5)4#  | 2.660 (5)  |
| O(6)-Na(2)5# | 2.608 (2)  |               |            |

---

Symmetry transformations used to generate equivalent atoms:

#1  $x, y-1/2, z-1/2$     #2  $-x+5/2, y, z$     #3  $-x+3, -y+3/2, z+1/2$

#4  $x-1/2, -y+3/2, z+1/2$     #5  $x, y+1/2, z+1/2$

#6  $-x+3, -y+3/2, z-1/2$

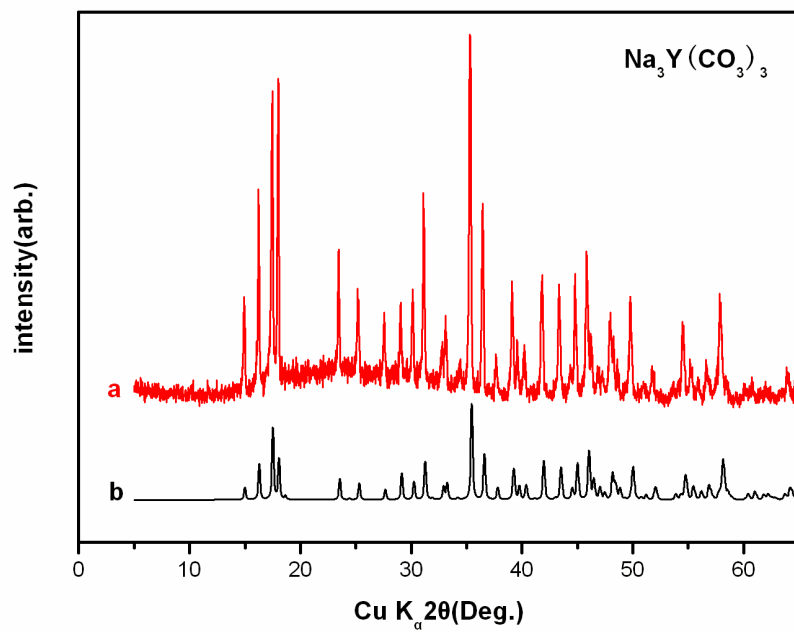

a. X-ray powder diffraction patterns of  $\text{Na}_3\text{Y}(\text{CO}_3)_3$

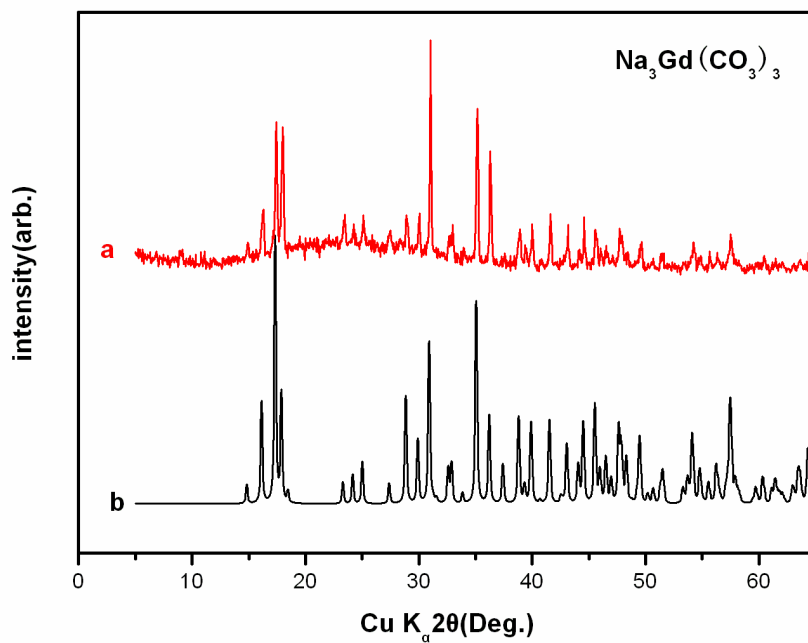

b. X-ray powder diffraction patterns of  $\text{Na}_3\text{Gd}(\text{CO}_3)_3$

Figure S1. X-ray powder diffraction patterns of  $\text{Na}_3\text{Y}(\text{CO}_3)_3$  and  $\text{Na}_3\text{Gd}(\text{CO}_3)_3$ .

(a) crystal sample and (b) simulation results

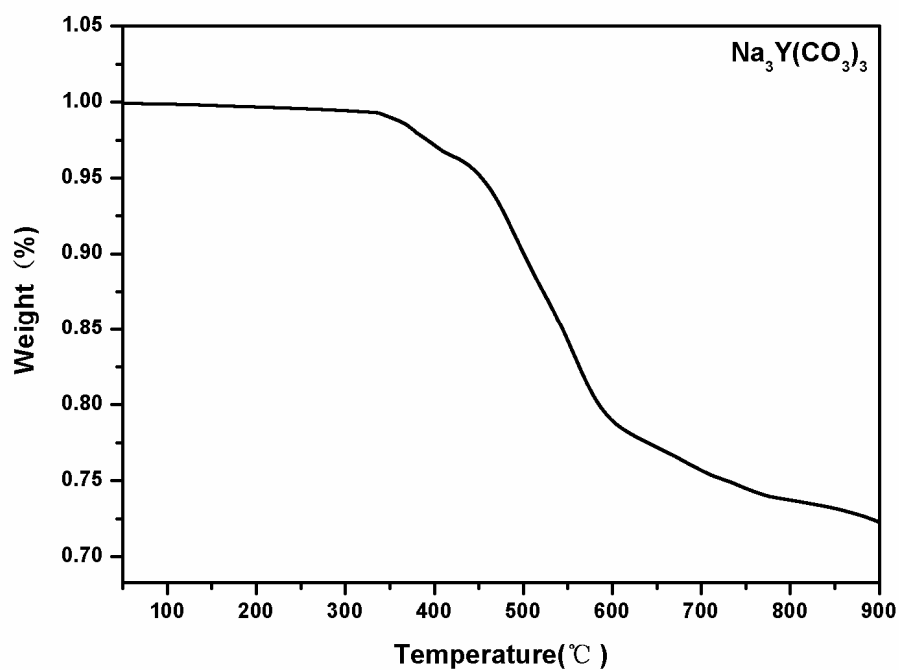

(a) TG diagrams for  $\text{Na}_3\text{Y}(\text{CO}_3)_3$

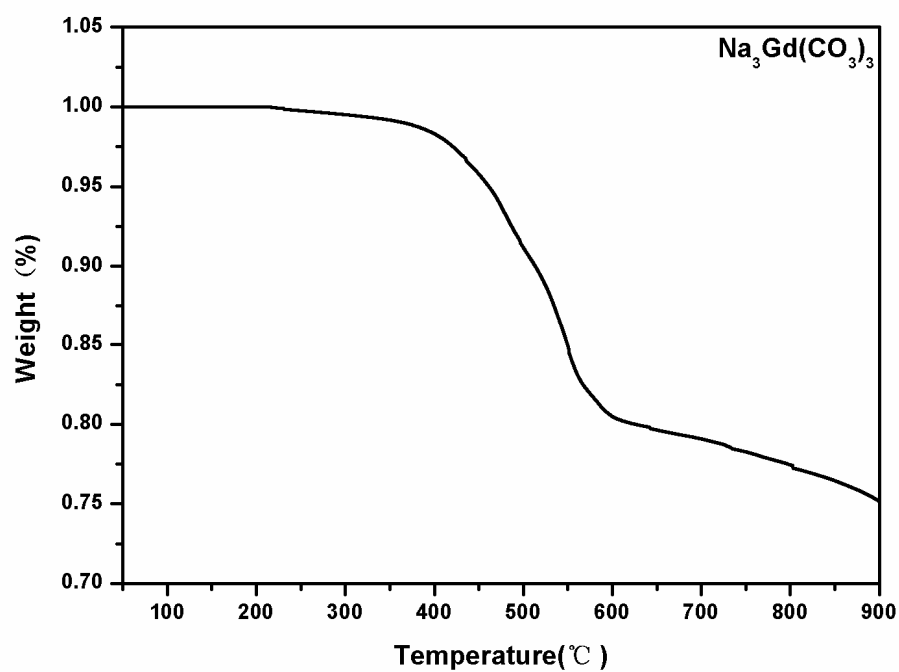

(b) TG diagrams for  $\text{Na}_3\text{Gd}(\text{CO}_3)_3$

Figure S2. TG diagrams for  $\text{Na}_3\text{Y}(\text{CO}_3)_3$  and  $\text{Na}_3\text{Gd}(\text{CO}_3)_3$

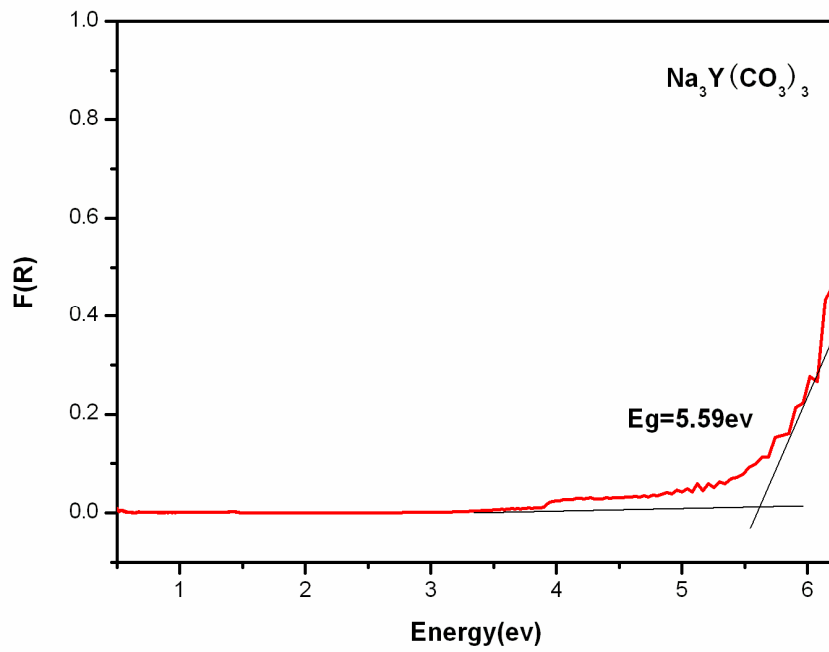

a. Diffuse reflectance absorption curve of the powder sample of  $\text{Na}_3\text{Y}(\text{CO}_3)_3$ .

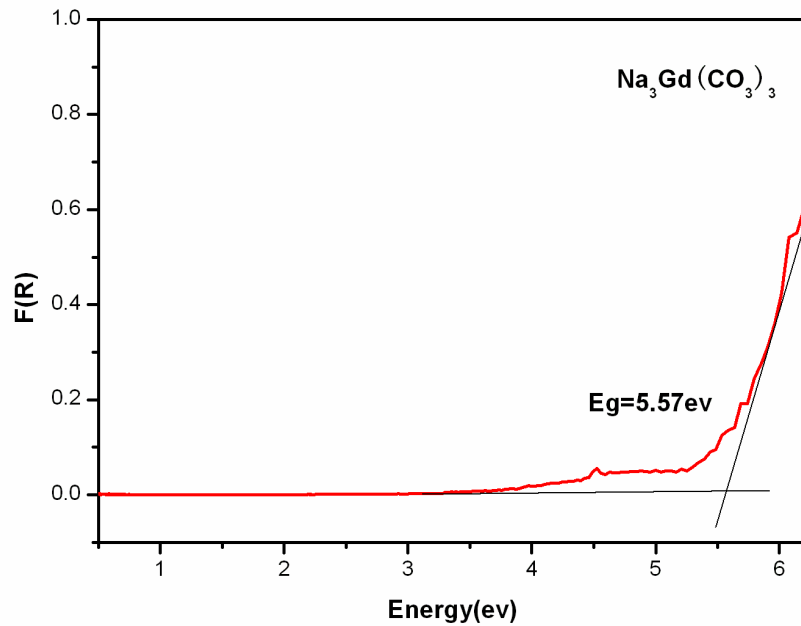

b. Diffuse reflectance absorption curve of the powder sample of  $\text{Na}_3\text{Gd}(\text{CO}_3)_3$ .

Figure S3. diffuse reflectance absorption curve of the powder sample of  $\text{Na}_3\text{Y}(\text{CO}_3)_3$  and  $\text{Na}_3\text{Gd}(\text{CO}_3)_3$ .



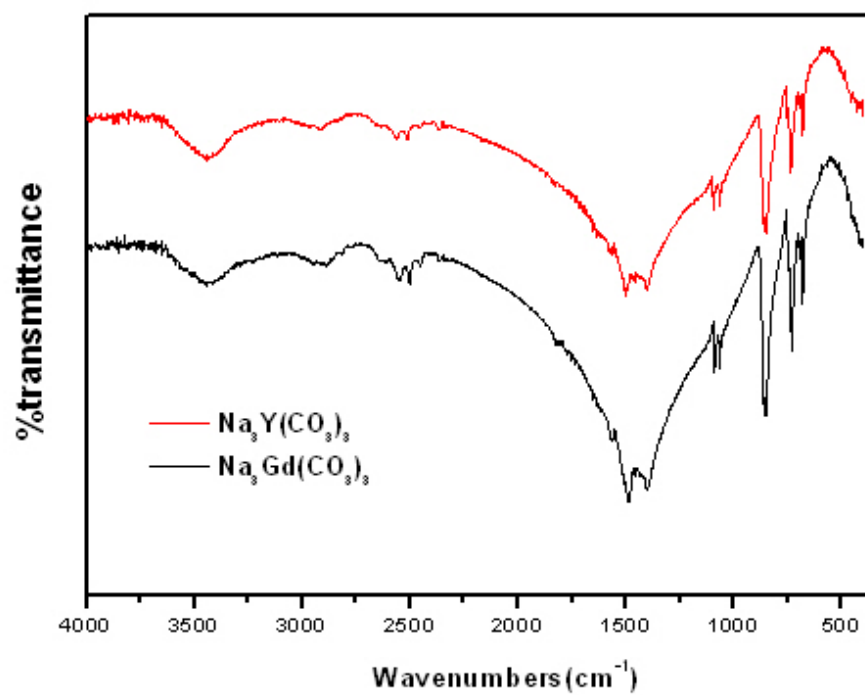

Figure S4. IR spectrum of  $\text{Na}_3\text{Y}(\text{CO}_3)_3$  and  $\text{Na}_3\text{Gd}(\text{CO}_3)_3$ .

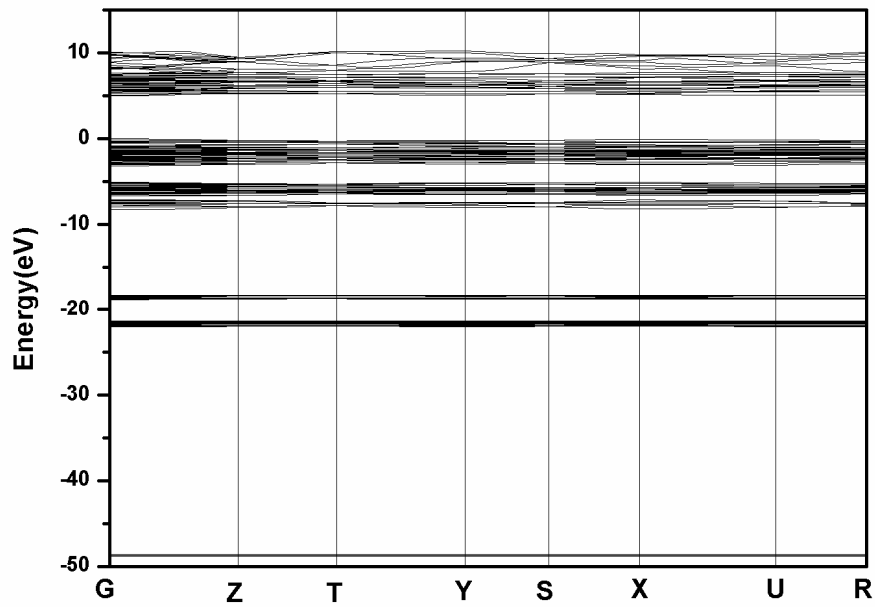

(a) Band structures for  $\text{Na}_3\text{Y}(\text{CO}_3)_3$

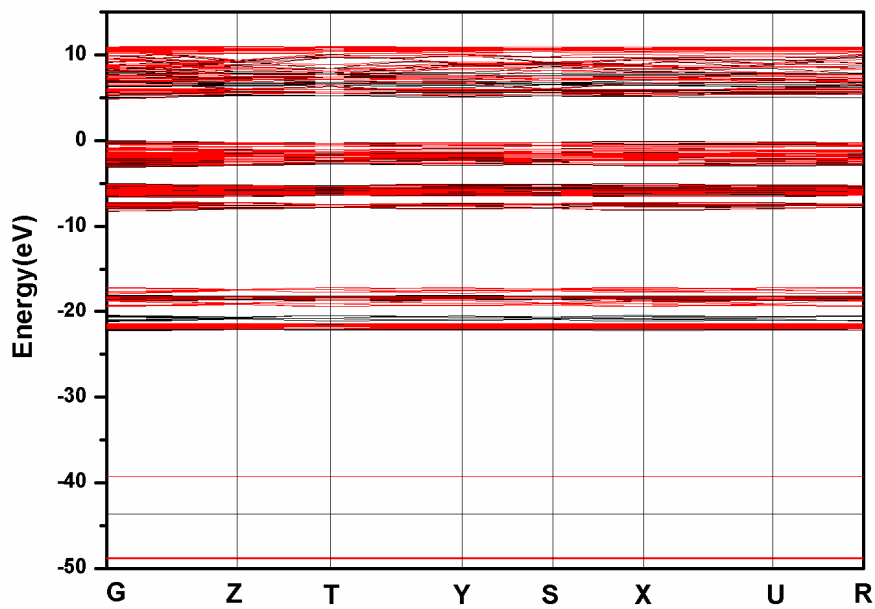

(b) Band structures for  $\text{Na}_3\text{Gd}(\text{CO}_3)_3$

Figure S5. Band structures for  $\text{Na}_3\text{Y}(\text{CO}_3)_3$  and  $\text{Na}_3\text{Gd}(\text{CO}_3)_3$ .
